# Supplementary material for: Mulberry flavonoids modulate rumen bacteria to alter fermentation kinetics in water buffalo
Source: PeerJ. 2022 Dec 14;10:e14309. doi: 10.7717/peerj.14309 (PMC9758972; doi:10.7717/peerj.14309)
Supplement: Supplemental Information 2 [file peerj-10-14309-s002.xlsx]

## Sheet: Sheet1
	Acetic acid	Propionic acid	Acetic acid/Propionic acid	Butyric acid	TVFA	pH	NH3-N	MCP
Control	14.08	9.59	1.4682	4.43	28.1	6.43	9.18	14.09
Control	12.76	9.39	1.35889	4.24	26.39	6.63	9.29	13.87
Control	13.67	10.1	1.35347	4.33	28.1	6.53	9.39	14.29
Control	12.98	9.59	1.35349	4.03	26.6	6.73	9.39	14.17
Control	14.18	9.18	1.54466	4.64	28	6.63	9.18	13.78
Control	13.87	10	1.387	4.64	28.51	6.53	9.18	14.18
Control	12.78	9.9	1.29091	4.33	27.01	6.53	9.39	14.37
Control	13.52	9.49	1.42466	4.74	27.75	6.73	9.29	13.82
Control	13.56	8.67	1.56401	4.74	26.97	6.63	9.18	14.39
Control	13.37	8.88	1.50563	4.33	26.58	6.53	9.29	13.88
MLF15	16.12	8.78	1.83599	5.45	30.35	6.84	8.67	14.59
MLF15	14.89	8.88	1.6768	5.25	29.02	6.63	8.88	15.52
MLF15	15	8.78	1.70843	5.56	29.34	6.84	8.78	15.3
MLF15	14.79	9	1.64333	5.46	29.25	6.73	8.85	14.59
MLF15	15.92	8.29	1.92039	5.66	29.87	6.63	8.91	14.9
MLF15	16.02	8.69	1.8435	5.45	30.16	6.84	8.78	14.69
MLF15	14.79	9.18	1.61111	5.56	29.53	6.73	8.85	14.78
MLF15	14.29	9.8	1.45816	5.25	29.34	6.63	8.91	14.8
MLF15	14.59	9.1	1.6033	5.66	29.35	6.73	8.98	14.72
MLF15	16.33	9.39	1.73908	5.25	30.97	6.73	8.67	14.49
MLF30	15.1	11.73	1.2873	5.2	32.03	6.53	10.89	16.35
MLF30	15.22	11.53	1.32003	5.41	32.16	6.63	9.99	15.9
MLF30	14.29	12.71	1.12431	4.89	31.89	6.53	10.24	16.63
MLF30	14.3	11.33	1.26214	5.28	30.91	6.53	11.07	15.9
MLF30	15.02	11.52	1.30382	5.04	31.58	6.53	10.94	15.57
MLF30	15.82	11.73	1.34868	5.11	32.66	6.73	10.17	17.1
MLF30	15.1	10.82	1.39556	5.2	31.12	6.53	12.38	16.4
MLF30	15.02	10.82	1.38817	5	30.84	6.73	11.2	16.38
MLF30	15.31	11.12	1.3768	5.12	31.55	6.53	10.57	16.33
MLF30	14.69	11.33	1.29656	5.2	31.22	6.63	10.19	15.4
MLF45	17.35	15.61	1.11147	5.19	38.15	6.33	10.92	17.55
MLF45	16.94	15	1.12933	5.41	37.35	6.43	11.12	17.24
MLF45	18.16	15	1.21067	5.31	38.47	6.53	11.83	17.65
MLF45	17.04	15	1.136	5	37.04	6.62	10.92	16.73
MLF45	17.55	14.08	1.24645	5	36.63	6.6	11.64	17.24
MLF45	17.96	15.1	1.1894	5.31	38.37	6.33	11.33	16.52
MLF45	17.24	15.39	1.12021	5.3	37.93	6.53	10.92	17.35
MLF45	17.86	14.29	1.24983	5.4	37.55	6.47	12.01	16.23
MLF45	17.04	13.98	1.21888	5.2	36.22	6.45	11.22	17.14
MLF45	16.73	14.9	1.12282	5.31	36.94	6.33	10.92	17.55
	17.387
